# Supplementary material
Source: publisher figshare collection journal article supplement (https://gsapubs.figshare.com/ndownloader/files/23304506)
Supplement: Supplementary file 1 [file 23304506]

## Sheet: Sheet1
Country	Deposit name	Type	Host rock	Pelitic/metapelitic host?	Local environment	Cumulative Production	WO3	W
Algeria	Laouni	Vein	Gneiss, migmatite		Contact aureole	-
Argentina	Los Avestruces-Las asperezas	Vein	Schist	Y	Veins cutting schist	297	67.5
Argentina	Los Conderes-El Aguila	Vein	Schist, gneiss	Y	Veins cutting schist and gneiss	X7.8	68.3
Australia	Mount Carbine	Vein/stockwork	Argillaceous sedimentary rock	Y	Contact aureole	16694	68.2
Australia	Mount Mulgine	Vein/stockwork	Metasediminetary rocks, ultramafic	Y	Contact aureole	-
Australia	Sunnymount	Vein/breccia pipe	Siltstone, chert/hornfel		Contact aureole	298		X
Australia	Torrington	Disseminated/vein/pipe	Quartz-topaz rock;Mole granite; Mudstone,sandstone,siltstone;Granite	Y	Intrusive	25555	65
Australia	Watershed Grid	Vein/skarn	Carbonaceous conglomerate,arenite		Contact aureole	-
Bolivia	Bolsa Negra	Vein	Hornfels	Y	Contact aureole	22339	X
Bolivia	Chambillaya	Vein/stockwork	Hornfels	Y	Contact aureole	26864	X
Bolivia	Chicote Grande	Vein/stockwork/alluvial	Quartzite,slate,sandstone	Y	Contact aureole	29000	X
Bolivia	Chojilla	Vein/stockwork	Shale/sandstone	Y	Contact aureole	31384	X
Bolivia	Enramada-Liliana	Vein	Schist; Granodiorite	Y	Contact aureole	29858	X
Bolivia	Kami	Vein	Hornfels	Y	Intrusive/Contact aureole	24864	X
Bolivia	Pueblo Viejo	Vein	Dacite		Intrusive	1334		X
Bolivia	Reconquistada	Vein	Phyllitic schist	Y	Contact aureole	600	X
Bolivia	Tazna	Vein	Hornfels	Y	Contact aureole	2141		X
Bolivia	Viloco	Vein	Sedimentary rocks; granite		Contact aureole	14132	X
Brazil	Pedra Preta	Vein	Metasedimentary,metavolcanic		Contact aureole	-
Burma	Mawchi mine	Vein/stockwork	Argillite,slate,limestone;Granite	Y	Intrusive/Contact aureole	11731		X
Burma	Mergui district	Vein/stockwork/placer	Sedimentary rocks (Metasediments and argillites); Granite	Y	Intrusive/Contact aureole	-
Burma	Tavoy district	Vein/stockwork/fossil placer	Granite; shale; agglomerate; sediments	Y	Intrusive/Contact aureole	-
Canada	Burnt Hill	Vein	Quartzite and argillite	Y	Contact aureole	63		X
Canada	Grey River	Vein	Amphibolitic gneiss, mica schist, orthoquartzite; granite	Y	Contact aureole	None
China	Bai Sha Po	Skarn/vein/alluvial	Limestone		Contact aureole	-
China	Dajishan	Vein/disseminated	Phyllite,argillite,quartzite	Y	Contact aureole	3700	65
China	Dalongshan	Vein/stockwork	-			100000	65
China	Dangping	Vein/stockwork	-
China	Muzhiyuan	Vein/stockwork	-
China	Piaotang	Vein/stockwork	-
China	Xialong	Vein/stockwork	Phyllite,quartzite	Y	Contact aureole
China	Xihuashan	Vein/stockwork	-
China	Zhandongkeng	Vein/stockwork	-
China	Gueimeishan	Vein/stockwork	Quartzite,phyllite	Y	Contact aureole	-
China	Huangsha	Vein	Quartzite, slate; Granite	Y	Contact aureole	None
China	Hukeng	Vein	Granite		Intrusive	30000	65
China	Jubankeng	Vein	Phyllite,quartzite	Y	Metasediments	-
China	Pangushan	Vein/stockwork	Sandstone;Granite		Contact aureole	-
China	Shangping	Vein/stockwork	Phyllite,sandstone	Y	Contact aureole	-
China	Shizhuyuan	Vein/stockwork/skarn	Limestone;Granite		Contact aureole	-
China	Ta'ergou	Vein/skarn	Quartz-sericite schists, marbles, hornblende quartz schists	Y	Metasediments	-
China	Wengyuan	Vein	Granite;Sandstone		Intrusive/Contact aureole	-
China	Xiangdong	Vein/stockwork			Contact aureole	-
China	Yangjiatan	Vein	Metasedimentay rocks		Contact aureole	-
China	Yaogangxian	Vein/skarn	Sandstone;Granite		Contact aureole	20000	65
China	Yochang district	Vein	Granite;Sandstone, shale	Y	Intrusive/Contact aureole
Czech Republic	Cinovec	Vein/stockwork/disseminated	Granite		Intrusive
Czech Republic	Krasno	Disseminated/Vein/Stockwork	Granite		Intrusive
France	Montbelleux	Vein/stockwork	Granite;Schist	Y	Contact aureole
France	Montredon-Labessonnié	Vein/stockwork	Mica schist; orthogneiss	Y	Contact aureole	80000	1.08
Guatemala	Ixtahuacan	Vein	Shale,sandstone;Tactic formation	Y	Structural	193		X
India	Agargaon (Maharashtra)	Vein/stockwork	Tourmaline breccia, tourmaline schist, chlorite schist	Y	Contact aureole	-
India	Degana (Rajasthan)	Vein/stockwork	Granite; Phyllite	Y	Intrusive/Contact aureole	795	65
Japan	Akenobe mine	Vein	Sandstone,slate,chert,greenstone;Diorite		Contact aureole	-
Japan	Kaneuchi mine	Vein	Shale, chert/hornfels	Y	Contact aureole	1390		X
Japan	Otani mine	Vein	Biotite granodiorite		Intrusive	1915	57.5
Japan	Takatori mine	Vein	Granite		-	100	X
Mongolia	Buren-Tsogto mine	Vein	Greisenized granite; sedimentary rocks		Intrusive/Contact aureole	400000	ore
Mongolia	Khovd Gol mine	Vein	Granite		-	-
Mongolia	Tsagaan-Dava mine	Vein quartz	Granite; Sandstone		Intrusive/Contact aureole	6000	60
Mongolia	Ulaan Uul mine	Vein quartz	Granite		-	-
Namibia	Brandberg West	Vein/stockwork	Schist,quartzite	Y	Contact aureole	5509.6		X
Namibia	Krantzberg	Vein/disseminated	Greisenized granite; biotite schist	Y	Intrusive	907	65
North Korea	Changseong district	Vein	Metamorphic rocks		Intrusive
North Korea	Ganggye district	Vein	Schist	Y	Contact aureole
North Korea	Gogsan Mannjon district	Vein	Granite,granodiorite; Mica schist and granitic gneiss	Y	Intrusive
North Korea	Kymgang	Vein/stockwork/skarn	Marble and schist	Y	Intrusive
North Korea	Shinheung	Vein	Schist	Y	Contact aureole
North Korea	Tahyng	Vein	Granite; Mica schist and granitic gneiss	Y	Contact aureole
Peru	Morococha	Vein/replacement	Limestone; Andesite, rhyolite pyroclastics		Contact aureole	800	X
Peru	Palca Once	Vein	Shale, limestone, sandstone	Y	Contact aureole	1093	X
Peru	Pasto Bueno	Vein	Greisenized granite; shale, quartzite	Y	Contact aureole	8713	65
Peru	San Cristobal	Vein	Phyllite; andesite, rhyolite, pyroclastics		Intrusive/Contact aureole	6121	X
Portugal	Arouca	Vein/stockwork	Schist; granite	Y	Contact aureole	240	60
Portugal	Borralha	Vein/stockwork	Schist	Y	Intrusive/Contact aureole	1460		X
Portugal	Panasqueira	Vein	Schist,quartzite; Granite	Y	Contact aureole	69685	72.55
Rwanda	Gifurwe	Vein/stockwork	Graphite schist; Schist;Granite	Y	Metasediments	10601	X
Rwanda	Lutsiro	Vein	Schist;granite	Y	-	-
Rwanda	Nyakabingo	Vein/stockwork	Shale;quartzite	Y	-	-
Saudi Arabia	Baid al Jimalah	Vein/stockwork	Porphyritic microgranite;metasiltstone,metasandstone/hornfels	Y	Intrusive/Contact aureole	-
Saudi Arabia	Bi'r Tawilal	Vein/stockwork	Poorphyritic biotite granite;sericite schist	Y	Intrusive/Contact aureole	-
South Africa	Orange River East	Vein	Paragneiss; granite		Contact aureole	312	65
South Africa	Orange River West	Vein	Metabasalt/meta-andesite		Contact aureole	-
South Africa	Shongoni	Vein/disseminated	Schist	Y	-	-
South Africa	Wallekraal	Vein	Graywacke	Y	Contact aureole	15	65
South Africa	Wolfram Schist	Vein	Schist	Y	Intrusive/Contact aureole	1714	65.47
South Korea	Bu-Duck	Vein?			-	-
South Korea	Dae Hwa	Vein	Granite gneiss		Contact aureole	-
South Korea	Dal Sung mine	Vein/breccia pipe	Andesite,rhyolite,agglomerate		Breccia	4398	55
South Korea	Sannae mine	Vein	Biotite granite		Intrusive	230	70
South Korea	Ssang Jeong mine	Vein	Granitic gneiss; hornblend schist	Y	Contact aureole	109		70
South Korea	Weolang mine	Vein	Hornfels/calc-silicate;Granite	Y	Contact aureole	1128		70
Former Soviet Union	Antonovogorsk	Vein	Granite;shalte,sandstone	Y	Intrusive	-
Former Soviet Union	Bayan	Skarn vein poligene	Granite/granodiorite;metasomatic greisen		Intrusive	-
Former Soviet Union	Belukha	Vein/stockwork	Quartz Diorite, granite		Intrusive	-
Former Soviet Union	Bom Gorkhom	Vein	Granite		Contact aureole	?
Former Soviet Union	Bukuka	Vein/stockwork	Greisenized granite; sandstone,shale	Y	Intrusive	-
Former Soviet Union	Dedosa Gora	Disseminated?/vein	Granite		-	-
Former Soviet Union	Dzhida district	Vein/stockwork/placer	Metasedimentary and metavolcanic;quartz diorite, granodiorite	Y	Contact aureole	?
Former Soviet Union	Festivallnoye	Skarn/vein	Granite		Contact aureole	?
Former Soviet Union	Karaoba	Vein/stockwork/greisen	Granite;quartz porphyry		Intrusive	-
Former Soviet Union	Kit-Teberda	Vein	Schist, gneiss;granite	Y	Contact aureole	None
Former Soviet Union	Magadan region	Vein	Shale, sandstone, conglomerate; granite	Y	Contact aureole	?
Spain	Barruecopardo	Vein/stockwork	Slate,conglomerate	Y	Intrusive	275	X
Spain	La Parrilla	Vein/stockwork	Slate,conglomerate	Y	Contact aureole	450	78
Spain	Santa Comba	Vein/disseminated	Granite,aplite		Intrusive	380		65
Spain	Silleda	Vein	Granite		Intrusive	-
Sudan	Jebel Eyob	Vein/stockwork	Granite		Intrusive	None
Thailand	Doi Mok	Skarn/vein	Limestone;biotite granite		Contact aureole	-
Thailand	Doi Than Ngoam	Vein/stockwork/breccia	Shale,siltstone,sandstone,minor limestone; Granite	Y	Contact aureole	1246
Thailand	Khao Soon mine	Vein/stockwork/breccia	Altered metasedimentary rocks		Contact aureole	-
United Kingdom	Carrock	Vein	Slate/hornfels;Granite/greisenized granite;Gabbro	Y	Intrusive/Contact aureole	50	70
United States	Hamme district	Vein	Granodiorite,tonalite;Phyllite	Y	Structural	9100	X
United States	Indian springs	Skarn/stockwork/bein	Sandstone,limestone; Monzongranite		Contact aureole	0.1		X
Vietnam	Pia Oac district	Vein/stockwork/placer	Shale;rhyolite,granite	Y	Contact aureole	9164	60
Zaire	Bishasha	Vein	Schist;Granites;Greisen	Y	-	-
Zaire	Sominki	Vein/stockwork/placer	Granite;Metasedimentary rocks; sediments	Y	Intrusive/Contact aureole	4587		X
Zimbabwe	Beardmore	Vein/skarn	Chlorite schist	Y	Contact aureole	-
Zimbabwe	Chiredzi-Chipinage district	Vein stockwork	Basalt		Contact aureole	-
Zimbabwe	Scheelite King	Vein	Tonalite		-	-
			Pelitic/metapelitic host reported	68
						# deposits	Production (WO3)
					Contact aureole	76	~380 Kt	380
					Intrusive/Contact aureole	16	~60 Kt	60
					Intrusive	20	~60 Kt	60
					Contact Aureole %	68		76
					Contact aureole+intrusive/contact aureole %	82		88
